# Supplementary material for: Metagenomic clustering reveals microbial contamination as an essential consideration in ultraconserved element design for phylogenomics with insect museum specimens
Source: PubMed Central journal article supplement (PMC8932080; doi:10.1002/ece3.8625), 2022-03-18
Supplement: ECE3-12-e8625-s001.pdf [file ECE3-12-e8625-s001.pdf]

**Supplementary Table 1.**

Summary statistics of reads used in draft assemblies post Trimmomatic quality filtering and accepted by the internal default filtering standards of *SPAdes-3.11.1* of the Illumina reads used in draft assemblies.

| Sample                                    | PE Unfiltered Reads/Filtered PE Reads | Total bp Filtered Reads | Mean length Filtered Reads | 95 CI length Filtered Reads | Minimum read length Filtered Reads | Maximum read length Filtered Reads | Median Filtered Reads |
|-------------------------------------------|---------------------------------------|-------------------------|----------------------------|-----------------------------|------------------------------------|------------------------------------|-----------------------|
| <i>D. abbreviatus</i>                     | 7905910 /7902470                      | 1975617500              | 250                        | 250                         | 250                                | 250                                | 250                   |
| <i>M. artapocyrtus</i>                    | 129642768 /125782895                  | 17834735726             | 141.79                     | 0.00                        | 40                                 | 151                                | 151                   |
| <i>P. erichsoni</i>                       | 115800304 /113778588                  | 14101411037             | 123.94                     | 0.00                        | 40                                 | 151                                | 130                   |
| <i>P. reticulatus</i>                     | 113248026 /110922492                  | 14389967103             | 129.73                     | 0.00                        | 40                                 | 151                                | 150                   |
| <i>Oribius sp.</i> Illumina reads         | 125314394 /121575413                  | 16157124237             | 132.09                     | 0.00                        | 40                                 | 151                                | 150                   |
| <i>Oribius sp.</i> ONT and Illumina reads | 125486210/ 121663052                  | 16273427960             | 133.76                     | 0.00                        | 40                                 | 20083                              | 151                   |

**Supplementary Table 2.**

Summary statistics from Oxford Nanopore sequencing results from with quality filtered reads using *Oribius sp.* draft genome assembly.

|                     | Unfiltered                                                                 | NanoFilt Q10 Filtered                                                                 |
|---------------------|----------------------------------------------------------------------------|---------------------------------------------------------------------------------------|
| Mean read length:   | 1,322.10                                                                   | 1,327.1                                                                               |
| Mean read quality:  | 9.9                                                                        | 10.8                                                                                  |
| Median read length: | 934                                                                        | 946.0                                                                                 |
| Median read quality | 10                                                                         | 10.8                                                                                  |
| Number of reads:    | 171,816.00                                                                 | 87,639                                                                                |
| Read length N50:    | 1,641.00                                                                   | 1,637.00                                                                              |
| Total bases:        | 227,163,436                                                                | 116,303,723                                                                           |
|                     | Unfiltered Number, percentage and megabases of reads above quality cutoffs | NanoFilt Q10 Filtered Number, percentage and megabases of reads above quality cutoffs |
| >Q5                 | 171816 (100.0%) 227.2Mb                                                    | 87639 (100.0%) 116.3Mb                                                                |
| >Q7                 | 171767 (100.0%) 227.1Mb                                                    | 87639 (100.0%) 116.3Mb                                                                |
| >Q10                | 87639 (51.0%) 116.3Mb                                                      | 87639 (100.0%) 116.3Mb                                                                |
| >Q12                | 2385 (1.4%) 2.6Mb                                                          | 2385 (2.7%) 2.6Mb                                                                     |

|      |                |                |
|------|----------------|----------------|
| >Q15 | 0 (0.0%) 0.0Mb | 0 (0.0%) 0.0Mb |
|------|----------------|----------------|

### Unfiltered Nanopore reads

Read lengths vs Average read quality plot

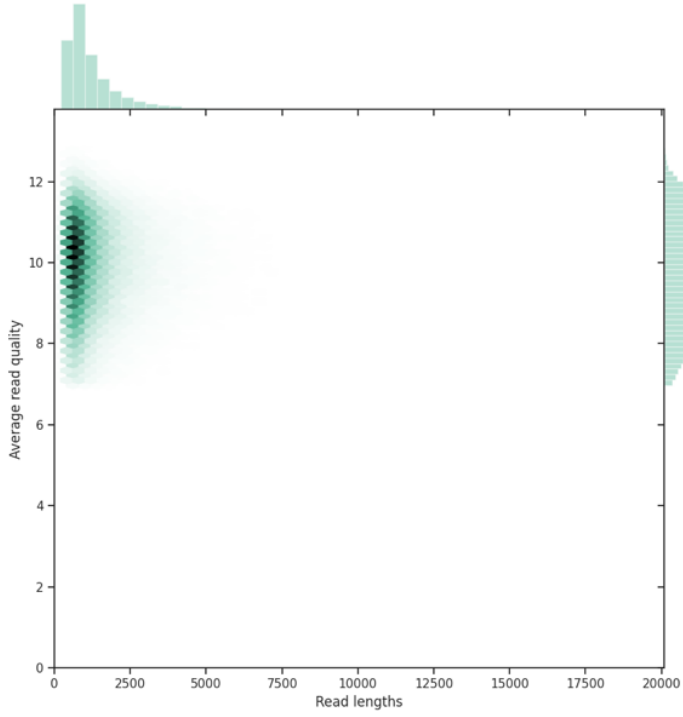

### NanoFilt >Q10 Nanopore reads

Read lengths vs Average read quality plot

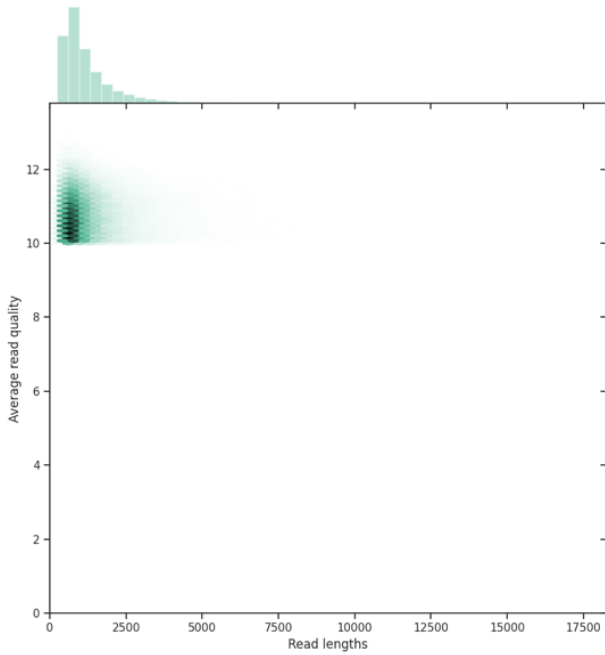

**Supplementary Figure 1.** *Oribius* sp. Oxford Nanopore sequencing results.

**Supplementary Table 3.**

Summary statistics of from BMAP stats.sh script of draft genomes.

| Species                              | <i>D. abbreviatus</i> | <i>M. artapocyrus</i> | <i>P. erichsoni</i> | <i>Oribius</i> sp. | <i>P. reticulatus</i> |
|--------------------------------------|-----------------------|-----------------------|---------------------|--------------------|-----------------------|
| Main genome scaffold total:          | 3862772               | 1610785               | 1548369             | 529906             | 1734547               |
| Main genome contig total:            | 3862772               | 1612124               | 1548394             | 530110             | 1734691               |
| Main genome scaffold sequence total: | 1202.063 MB           | 1156.021 MB           | 567.173 MB          | 667.428 MB         | 840.673 MB            |
| Main genome contig sequence total:   | 1202.063 MB           | 1156.003 MB           | 567.172 MB          | 667.421 MB         | 840.670 MB            |
| Main genome scaffold N/L50:          | 613470/437            | 172377/1.397 KB       | 499752/370          | 90998/2.19 KB      | 415710/553            |
| Main genome contig N/L50:            | 613470/437            | 172734/1.395 KB       | 499765/370          | 91079/2.189 KB     | 416747/552            |
| Main genome scaffold N/L90:          | 2815901/133           | 1114158/275           | 1274971/245         | 302873/612         | 1364794/259           |
| Main genome contig N/L90:            | 2815901/133           | 1115041/275           | 1274989/245         | 303005/612         | 1364879/259           |
| Max scaffold length:                 | 16.718 KB             | 534.766 KB            | 26.632 KB           | 24.053 KB          | 24.755 KB             |
| Max contig length:                   | 16.718 KB             | 534.766 KB            | 26.632 KB           | 24.053 KB          | 24.755 KB             |
| Number of scaffolds > 50 KB:         | 0                     | 44                    | 0                   | 0                  | 0                     |
| % main genome in scaffolds > 50 KB:  | 0.00%                 | 0.40%                 | 0.00%               | 0.00%              | 0.00%                 |

**Supplementary Table 4.**

List of genome accession id's from RefSeq and WormBase added into the final database in addition to the Rice Weevil Genome, Kraken2 Fungal, and Kraken2 Bacterial databases.

caenorhabditis\_elegans.PRJNA13758.WBPS14.genomic\_masked.fa.gz.f  
echinostoma\_caproni.PRJEB1207.WBPS14.genomic\_masked.fa.gz.fna  
GCF\_000313855.1\_ASM31385v1\_genomic.fna.gz.fna  
GCF\_002532875.1\_vjacob\_1.0\_genomic.fna.gz.fna  
gongylonema\_pulchrum.PRJEB505.WBPS14.genomic\_masked.fa.gz.fna  
hymenolepis\_diminuta.PRJEB507.WBPS14.genomic\_masked.fa.gz  
protopolystoma\_xenopodis.PRJEB1201.WBPS14.genomic\_masked.fa.gz.  
schistosoma\_curassoni.PRJEB519.WBPS14.genomic\_masked.fa.gz.fna  
schistosoma\_mansoni.PRJEA36577.WBPS14.genomic\_masked.fa.gz.fna  
soboliphyme\_baturini.PRJEB516.WBPS14.genomic\_masked.fa.gz.fna

### BUSCO Assessment Results

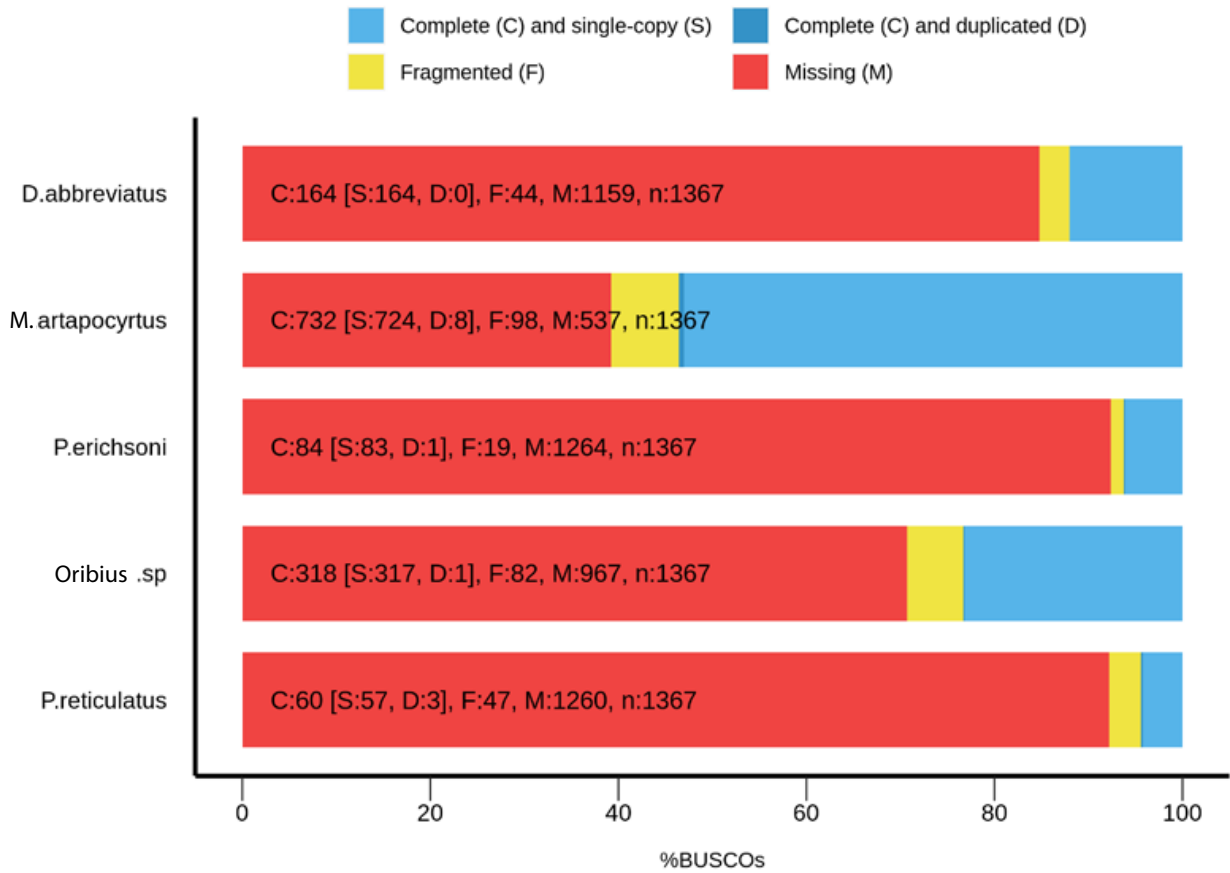

**Supplementary Figure 2.** BUSCO 3.0.2 results using the ArthropodaOdb10 database and fly as the Augustus species gene prediction model.
